# Supplementary material for: Multi-parent multi-environment QTL analysis: an illustration with the EU-NAM Flint population
Source: PubMed Central journal article supplement (PMC7419492; doi:10.1007/s00122-020-03621-0), 2020-06-09
Supplement: 122_2020_3621_MOESM1_ESM.pdf [file 122_2020_3621_MOESM1_ESM.pdf]

## **Multi-parent multi-environment QTL analysis: an illustration with the EU-NAM Flint population - Supplementary material**

Vincent Garin · Marcos Malosetti · Fred van Eeuwijk

the date of receipt and acceptance should be inserted later

---

Vincent Garin  
Biometris, Wageningen University and research Center, P.O Box 100, 6700AC Wageningen,  
The Netherlands.  
E-mail: [vincent.garin6@gmail.com](mailto:vincent.garin6@gmail.com)

### S1: Heritability computation

We computed the trait heritabilities on a line mean basis within the  $j^{th}$  cross using the formula 3 from Hung et al. (2012)

$$h^2 = \frac{\sigma_g^2(cr_j)}{\sigma_g^2(cr_j) + \frac{\sigma_{ge}^2(cr_j)}{N_{env}} + \frac{\sigma_e^2(cr_j)}{N_{env} * N_{rep}}} \quad (1)$$

The model used for the computation of the heritabilities was the following:

$$y_{ijklm} = \mu + env_k + rep_{l(k)} + block_{m(lk)} + cross_j + G_i(cross_j) + G_i(cross_j) * env_k + e_{ijklm} \quad (2)$$

In model 2, all terms were random and the variance of the error term was cross-specific.

**Table 1** EU-NAM Flint population within cross variance components for dry matter yield. Genetic variance ( $\sigma_g^2$ ) and standard error  $se(\sigma_g^2)$ , Genotype-by-environment variance ( $\sigma_{ge}^2$ ) and standard error  $se(\sigma_{ge}^2)$ , heritability ( $h^2$ ).

|        | $\sigma_g^2$ | $se(\sigma_g^2)$ | $\sigma_{ge}^2$ | $se(\sigma_{ge}^2)$ | $h^2$ (%) |
|--------|--------------|------------------|-----------------|---------------------|-----------|
| D152   | 208.36       | 65.38            | 93.36           | 12.26               | 60.65     |
| EC49A  | 0.11         | 93.29            | 80.07           | 63.86               | 0.04      |
| EP44   | 257.42       | 139.59           | 29.11           | 176.75              | 66.64     |
| EZ5    | 41.23        | 190.46           | 0.00            |                     | 19.14     |
| F03802 | 145.96       | 47.45            | 528.20          | 282.09              | 27.36     |
| F2     | 302.10       | 79.10            | 75.92           | 66.24               | 71.97     |
| F283   | 361.53       | 70.04            | 0.00            |                     | 77.90     |
| F64    | 222.86       | 80.69            | 100.30          | 61.39               | 60.92     |
| UH006  | 224.28       | 60.12            | 138.10          | 81.42               | 57.17     |
| UH009  | 20.12        | 37.53            | 75.42           | 62.59               | 12.70     |
| DK105  | 270.12       | 75.60            | 106.34          | 61.26               | 59.76     |

## S2: Plot and list of the detected QTLs with the different combinations of methods and models

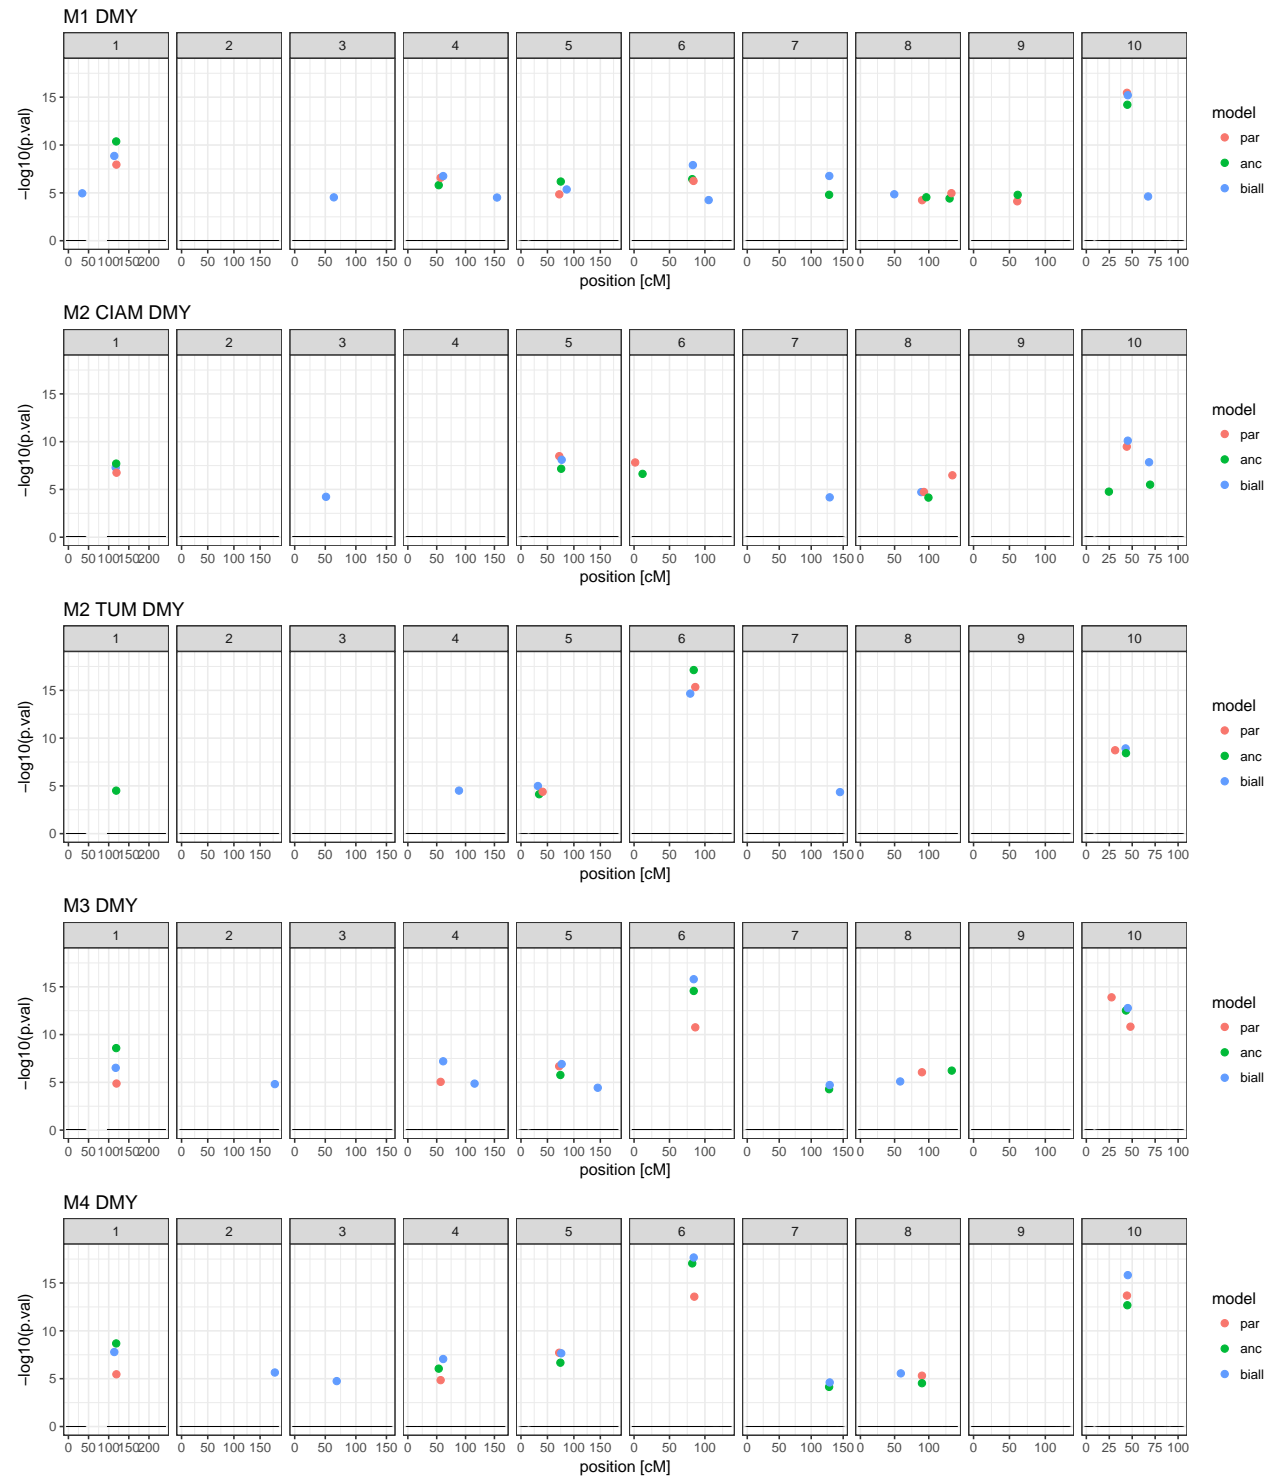

**Fig. 1** Plot of detected QTLs in the EU-NAM Flint population for dry matter yield with the different methods from top (M1) to bottom (M4). The dots represent the detected QTLs with the different QTL models (red: parental, green: ancestral, blue: bi-allelic).

**Table 2** List of detected QTL positions in the EU-NAM Flint population for dry matter yield using M1 per QTL model: parental, ancestral, and bi-allelic

|            | n  | Mk. names     | chr | pos [cM] | $-\log_{10}(\text{pval})$ |
|------------|----|---------------|-----|----------|---------------------------|
| parental   |    |               |     |          |                           |
|            | 1  | PZE.101146834 | 1   | 119.1    | 8                         |
|            | 2  | PZE.104027223 | 4   | 56.8     | 6.6                       |
|            | 3  | PZE.105054186 | 5   | 72.4     | 4.8                       |
|            | 4  | PZE.106101027 | 6   | 83.9     | 6.3                       |
|            | 5  | PZE.108099840 | 8   | 90.2     | 4.2                       |
|            | 6  | PZE.108131921 | 8   | 133.1    | 5                         |
|            | 7  | PZE.109054632 | 9   | 60.9     | 4.1                       |
|            | 8  | PZE.110048720 | 10  | 44.3     | 15.5                      |
| ancestral  |    |               |     |          |                           |
|            | 1  | PZE.101144216 | 1   | 118.6    | 10.4                      |
|            | 2  | PZE.104029507 | 4   | 53.5     | 5.8                       |
|            | 3  | PZE.105068880 | 5   | 75.2     | 6.2                       |
|            | 4  | PZE.106098066 | 6   | 82.1     | 6.4                       |
|            | 5  | PZE.107128534 | 7   | 128      | 4.8                       |
|            | 6  | PZE.108109731 | 8   | 96.4     | 4.5                       |
|            | 7  | PZE.108131479 | 8   | 130.4    | 4.4                       |
|            | 8  | PZE.109058296 | 9   | 61.5     | 4.8                       |
|            | 9  | PZE.110049068 | 10  | 44.7     | 14.2                      |
| bi-allelic |    |               |     |          |                           |
|            | 1  | PZE.101024519 | 1   | 34.3     | 5                         |
|            | 2  | PZE.101143233 | 1   | 113.9    | 8.9                       |
|            | 3  | PZE.103096063 | 3   | 64       | 4.5                       |
|            | 4  | PZE.104052802 | 4   | 61.2     | 6.8                       |
|            | 5  | PZE.104153023 | 4   | 154.5    | 4.5                       |
|            | 6  | PZE.105103875 | 5   | 86.4     | 5.4                       |
|            | 7  | PZE.106097991 | 6   | 83       | 7.9                       |
|            | 8  | PZE.106114241 | 6   | 105.3    | 4.3                       |
|            | 9  | PZE.107128336 | 7   | 128.3    | 6.8                       |
|            | 10 | PZE.108027746 | 8   | 49.5     | 4.9                       |
|            | 11 | PZE.110049474 | 10  | 45.2     | 15.2                      |
|            | 12 | PZE.110086343 | 10  | 67.3     | 4.6                       |

**Table 3** List of detected QTL positions in the EU-NAM Flint population for dry matter yield using M2 in CIAM environment per QTL model: parental, ancestral, and bi-allelic

|            | n | Mk. names     | chr | pos [cM] | -log <sub>10</sub> (pval) |
|------------|---|---------------|-----|----------|---------------------------|
| parental   |   |               |     |          |                           |
|            | 1 | PZE.101147104 | 1   | 119.4    | 6.8                       |
|            | 2 | PZE.105054186 | 5   | 72.4     | 8.5                       |
|            | 3 | PZA00606.3    | 6   | 1.6      | 7.8                       |
|            | 4 | PZE.108104106 | 8   | 92.9     | 4.7                       |
|            | 5 | PZE.108133621 | 8   | 134.5    | 6.5                       |
|            | 6 | PZE.110049572 | 10  | 44.1     | 9.5                       |
| ancestral  |   |               |     |          |                           |
|            | 1 | PZE.101144216 | 1   | 118.6    | 7.7                       |
|            | 2 | PZE.105063383 | 5   | 76       | 7.2                       |
|            | 3 | PZE.106009233 | 6   | 12       | 6.6                       |
|            | 4 | PZE.108110343 | 8   | 99.5     | 4.1                       |
|            | 5 | PZE.110009558 | 10  | 24.6     | 4.8                       |
|            | 6 | PZE.110087849 | 10  | 69.5     | 5.5                       |
| bi-allelic |   |               |     |          |                           |
|            | 1 | PZE.101144248 | 1   | 117.4    | 7.3                       |
|            | 2 | PZE.103072486 | 3   | 51.2     | 4.2                       |
|            | 3 | PZE.105074287 | 5   | 76.9     | 8.1                       |
|            | 4 | PZE.107128846 | 7   | 128.9    | 4.2                       |
|            | 5 | PZE.108099415 | 8   | 89.1     | 4.7                       |
|            | 6 | PZE.110049474 | 10  | 45.2     | 10.1                      |
|            | 7 | PZE.110088931 | 10  | 68.4     | 7.8                       |

**Table 4** List of detected QTL positions in the EU-NAM Flint population for dry matter yield using M2 in TUM environment per QTL model: parental, ancestral, and bi-allelic

|            | n | Mk. names     | chr | pos [cM] | $-\log_{10}(\text{pval})$ |
|------------|---|---------------|-----|----------|---------------------------|
| parental   |   |               |     |          |                           |
|            | 1 | PZE.105019465 | 5   | 40.9     | 4.4                       |
|            | 2 | PZE.106102395 | 6   | 86.4     | 15.4                      |
|            | 3 | PZE.110013764 | 10  | 31.4     | 8.7                       |
| ancestral  |   |               |     |          |                           |
|            | 1 | PZE.101144216 | 1   | 118.6    | 4.5                       |
|            | 2 | PZE.105017551 | 5   | 34.3     | 4.1                       |
|            | 3 | PZE.106101278 | 6   | 84.2     | 17.1                      |
|            | 4 | PZE.110049040 | 10  | 43.2     | 8.4                       |
| bi-allelic |   |               |     |          |                           |
|            | 1 | PZE.104094429 | 4   | 88.6     | 4.5                       |
|            | 2 | PZE.105017975 | 5   | 32       | 5                         |
|            | 3 | PZE.106095383 | 6   | 79.3     | 14.7                      |
|            | 4 | PZE.107136612 | 7   | 145      | 4.4                       |
|            | 5 | PZE.110049406 | 10  | 42.8     | 8.9                       |

**Table 5** List of detected QTL positions in the EU-NAM Flint population for dry matter yield using M3 per QTL model: parental, ancestral, and bi-allelic

|            | n  | Mk. names     | chr | pos [cM] | -log <sub>10</sub> (pval) |
|------------|----|---------------|-----|----------|---------------------------|
| parental   |    |               |     |          |                           |
|            | 1  | PZE.101147104 | 1   | 119.4    | 4.9                       |
|            | 2  | PZE.104027223 | 4   | 56.8     | 5.1                       |
|            | 3  | PZE.105062183 | 5   | 72.2     | 6.7                       |
|            | 4  | PZE.106102395 | 6   | 86.4     | 10.8                      |
|            | 5  | PZE.108099425 | 8   | 90       | 6.1                       |
|            | 6  | PZE.110010098 | 10  | 27.5     | 13.9                      |
|            | 7  | PZE.110049922 | 10  | 48.1     | 10.8                      |
| ancestral  |    |               |     |          |                           |
|            | 1  | PZE.101144216 | 1   | 118.6    | 8.6                       |
|            | 2  | PZE.105065789 | 5   | 74.5     | 5.8                       |
|            | 3  | PZE.106101278 | 6   | 84.2     | 14.6                      |
|            | 4  | PZE.107128534 | 7   | 128      | 4.3                       |
|            | 5  | PZE.108133100 | 8   | 133.6    | 6.2                       |
|            | 6  | PZE.110049040 | 10  | 43.2     | 12.5                      |
| bi-allelic |    |               |     |          |                           |
|            | 1  | PZE.101144248 | 1   | 117.4    | 6.5                       |
|            | 2  | PZE.102192367 | 2   | 178.2    | 4.8                       |
|            | 3  | PZE.104052802 | 4   | 61.2     | 7.2                       |
|            | 4  | PZE.104110016 | 4   | 115.6    | 4.9                       |
|            | 5  | PZE.105074287 | 5   | 76.9     | 6.9                       |
|            | 6  | PZE.105160757 | 5   | 145.1    | 4.4                       |
|            | 7  | PZE.106101278 | 6   | 84.2     | 15.8                      |
|            | 8  | PZE.107128846 | 7   | 128.9    | 4.7                       |
|            | 9  | PZE.108057679 | 8   | 58.2     | 5.1                       |
|            | 10 | PZE.110049474 | 10  | 45.2     | 12.8                      |

**Table 6** List of detected QTL positions in the EU-NAM Flint population for dry matter yield using M4 per QTL model: parental, ancestral, and bi-allelic

|            | n | Mk. names     | chr | pos [cM] | $-\log_{10}(\text{pval})$ |
|------------|---|---------------|-----|----------|---------------------------|
| parental   |   |               |     |          |                           |
|            | 1 | PZE.101146834 | 1   | 119.1    | 5.5                       |
|            | 2 | PZE.104027223 | 4   | 56.8     | 4.9                       |
|            | 3 | PZE.105062183 | 5   | 72.2     | 7.7                       |
|            | 4 | PZE.106099144 | 6   | 85       | 13.6                      |
|            | 5 | PZE.108099425 | 8   | 90       | 5.3                       |
|            | 6 | PZE.110048720 | 10  | 44.3     | 13.7                      |
| ancestral  |   |               |     |          |                           |
|            | 1 | PZE.101144216 | 1   | 118.6    | 8.7                       |
|            | 2 | PZE.104029507 | 4   | 53.5     | 6.1                       |
|            | 3 | PZE.105065789 | 5   | 74.5     | 6.7                       |
|            | 4 | PZE.106098066 | 6   | 82.1     | 17                        |
|            | 5 | PZE.107128534 | 7   | 128      | 4.1                       |
|            | 6 | PZE.108099425 | 8   | 90       | 4.5                       |
|            | 7 | PZE.110049068 | 10  | 44.7     | 12.7                      |
| bi-allelic |   |               |     |          |                           |
|            | 1 | PZE.101143233 | 1   | 113.9    | 7.8                       |
|            | 2 | PZE.102192367 | 2   | 178.2    | 5.6                       |
|            | 3 | PZE.103106593 | 3   | 68.7     | 4.8                       |
|            | 4 | PZE.104052802 | 4   | 61.2     | 7.1                       |
|            | 5 | PZE.105063758 | 5   | 76.1     | 7.7                       |
|            | 6 | PZE.106101278 | 6   | 84.2     | 17.7                      |
|            | 7 | PZE.107128846 | 7   | 128.9    | 4.6                       |
|            | 8 | PZE.108058577 | 8   | 59.1     | 5.6                       |
|            | 9 | PZE.110049474 | 10  | 45.2     | 15.8                      |



**S3: QTL additive effects allelic series**

EU-NAM chr 6 82.1 cM

**Table 7** Additive effects and standard deviations of the QTL detected on chromosome 6 at 82.1 cM in the EU-NAM Flint population for dry matter yield with the ancestral model

|        | $\beta_{M1}$ | $\beta_{M4-E1}$ | $\beta_{M4-E2}$ | $sd(\beta_{M1})$ | $sd(\beta_{M4-E1})$ | $sd(\beta_{M4-E2})$ | $\beta/sd(\beta)(M1)$ | $\beta/sd(\beta)(M4-E1)$ | $\beta/sd(\beta)(M4-E2)$ |
|--------|--------------|-----------------|-----------------|------------------|---------------------|---------------------|-----------------------|--------------------------|--------------------------|
| UH007  | 0.00         | 0.00            | 0.00            | 0.00             | 0.00                | 0.00                |                       |                          |                          |
| EZ5    | 0.00         | 0.00            | 0.00            | 0.00             | 0.00                | 0.00                |                       |                          |                          |
| UH009  | 0.00         | 0.00            | 0.00            | 0.00             | 0.00                | 0.00                |                       |                          |                          |
| D152   | -4.07        | -1.19           | -7.20           | 0.71             | 0.83                | 0.83                | -5.75                 | -1.42                    | -8.63                    |
| EC49A  | -4.07        | -1.19           | -7.20           | 0.71             | 0.83                | 0.83                | -5.75                 | -1.42                    | -8.63                    |
| F03802 | -4.07        | -1.19           | -7.20           | 0.71             | 0.83                | 0.83                | -5.75                 | -1.42                    | -8.63                    |
| F2     | -4.07        | -1.19           | -7.20           | 0.71             | 0.83                | 0.83                | -5.75                 | -1.42                    | -8.63                    |
| F283   | -4.07        | -1.19           | -7.20           | 0.71             | 0.83                | 0.83                | -5.75                 | -1.42                    | -8.63                    |
| UH006  | -4.07        | -1.19           | -7.20           | 0.71             | 0.83                | 0.83                | -5.75                 | -1.42                    | -8.63                    |
| DK105  | -4.07        | -1.19           | -7.20           | 0.71             | 0.83                | 0.83                | -5.75                 | -1.42                    | -8.63                    |
| F64    | -6.13        | 0.52            | -12.81          | 2.13             | 2.40                | 2.40                | -2.88                 | 0.22                     | -5.34                    |
| EP44   | -0.94        | 5.65            | 10.19           | 5.72             | 5.63                | 5.63                | -0.17                 | 1.00                     | 1.81                     |

#### S4: Plot QTL additive effects allelic series

Comparison of the additive effect allelic series between M1, M2, M3 and M4 and two environments for two QTL positions (one in the EU-NAM, the other in the US-NAM). The upper panel contains the first environment results and the lower panel the results from the second environment.

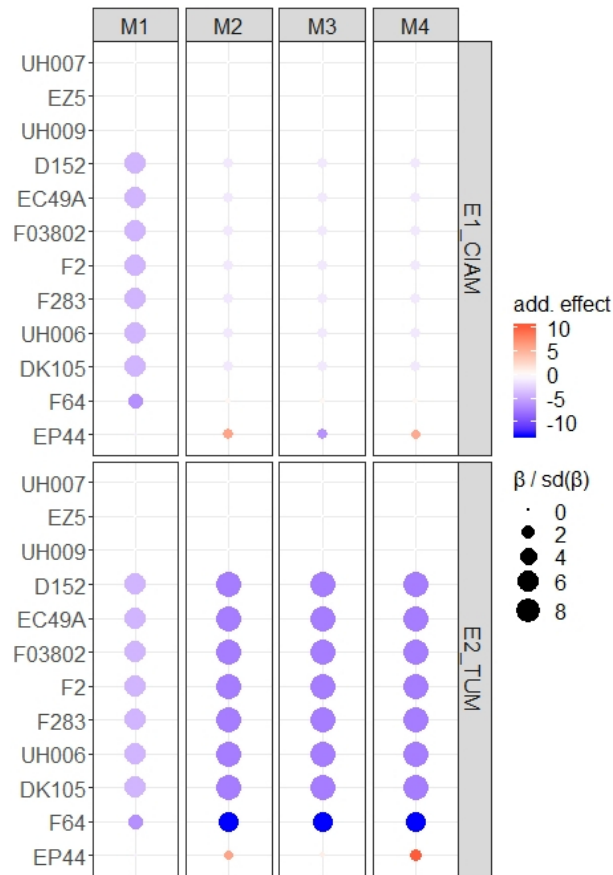

**Fig. 2** Comparison of the allelic substitution effect series between M1, M2, M3 and M4 and two environments for the QTL detected in the EU-NAM Flint population for dry matter yield with the ancestral model on chromosome 6 at 82.1 cM. The color intensities are proportional to the allelic effect. The allelic effects are deviations in decitons per hectare with respect to the central parent (UH007). The sizes of the dots are proportional to the ratio between the allelic effect and its standard error.

---

**References**

- Hung H, Browne C, Guill K, Coles N, Eller M, Garcia A, Lepak N, Melia-Hancock S, Oropeza-Rosas M, Salvo S, et al. (2012) The relationship between parental genetic or phenotypic divergence and progeny variation in the maize nested association mapping population. *Heredity* 108(5):490–499, DOI 10.1038/hdy.2011.103
